# Supplementary material for: Accuracy of Frozen Section Biopsy in the Diagnosis of Endometrial Cancer: A Systematic Review and Meta-Analysis
Source: MDPI journal article supplement (doi:10.3390/cancers16061200), 2024-03-19
Supplement: s1 [file s1]

**Supplementary Table 1.** Quality evaluation of the included studies based on the QUADAS-2 tool.

| Study                    | Risk of bias      |            |                    |               | Application concerns |            |                    |
|--------------------------|-------------------|------------|--------------------|---------------|----------------------|------------|--------------------|
|                          | Patient selection | Index test | Reference standard | Flow & timing | Patient selection    | Index test | Reference standard |
| 1.Boyraz, 2016           | High              | Low        | Low                | Low           | Low                  | Low        | Low                |
| 2.Fishman, 2000          | High              | Low        | Low                | Low           | Low                  | Low        | Low                |
| 3.Desouki, 2017          | High              | Low        | Low                | Low           | Low                  | Low        | Low                |
| 4.Şenol, 2017            | High              | Low        | Low                | Low           | Low                  | Low        | Low                |
| 5.Kanis, 2016            | High              | Low        | Low                | Low           | Low                  | Low        | Low                |
| 6.Wang, 2016             | High              | Low        | Low                | Low           | Low                  | Low        | Low                |
| 7.Karabagli, 2015        | High              | Low        | Low                | Low           | Low                  | Low        | Low                |
| 8.Sala, 2014             | High              | Low        | Low                | Low           | Low                  | Low        | Low                |
| 9.Acikalin, 2015         | High              | Low        | Low                | Low           | Low                  | Low        | Low                |
| 10.Gallego, 2014         | High              | Low        | Low                | Low           | Low                  | Low        | Low                |
| 11.Turan, 2013           | High              | Low        | Low                | Low           | Low                  | Low        | Low                |
| 12.Kumar, 2012           | High              | Low        | Low                | Low           | Low                  | Low        | Low                |
| 13.Ozturk, 2012          | High              | Low        | Low                | Low           | Low                  | Low        | Low                |
| 14.Kumar, 2011           | High              | Low        | Low                | Low           | Low                  | Low        | Low                |
| 15.Yanazume, 2011        | High              | Low        | Low                | Low           | Low                  | Low        | Low                |
| 16.Celik, 2010           | High              | Low        | Low                | Low           | Low                  | Low        | Low                |
| 17.Papadia, 2009         | High              | Low        | Low                | Low           | Low                  | Low        | Low                |
| 18.Furukawa, 2010        | High              | Low        | Low                | Low           | Low                  | Low        | Low                |
| 19.Kucera, 2009          | High              | Low        | Low                | Low           | Low                  | Low        | Low                |
| 20.Egle, 2008            | High              | Low        | Low                | Low           | Low                  | Low        | Low                |
| 21.Kir, 2004             | High              | Low        | Low                | Low           | Low                  | Low        | Low                |
| 22.Kayıkçioğlu, 2002     | High              | Low        | Low                | Low           | Low                  | Low        | Low                |
| 23.Quinlivan, 2001       | High              | Low        | Low                | Low           | Low                  | Low        | Low                |
| 24.Kucera, 2000          | High              | Low        | Low                | Low           | Low                  | Low        | Low                |
| 25.Zorlu, 1993           | High              | Low        | Low                | Low           | Low                  | Low        | Low                |
| 26.Durdağ, 2021          | High              | Low        | Low                | Low           | Low                  | Low        | Low                |
| 27.Ugaki, 2011           | High              | Low        | Low                | Low           | Low                  | Low        | Low                |
| 28.Fotiou, 2009          | High              | Low        | Low                | Low           | Low                  | Low        | Low                |
| 29.Sat, 2009             | High              | Low        | Low                | Low           | Low                  | Low        | Low                |
| 30.Mao, 2008             | High              | Low        | Low                | Low           | Low                  | Low        | Low                |
| 31.Nakai, 2021           | High              | Low        | Low                | Low           | Low                  | Low        | Low                |
| 32.Iitsuka, 2021         | High              | Low        | Low                | Low           | Low                  | Low        | Low                |
| 33.Guo, 2022             | High              | Low        | Low                | Low           | Low                  | Low        | Low                |
| 34.Bandala-Jacques, 2020 | High              | Low        | Low                | Low           | Low                  | Low        | Low                |
| 35.Giglio, 2020          | High              | Low        | Low                | Low           | Low                  | Low        | Low                |
| 36.Rei, 2019             | High              | Low        | Low                | Low           | Low                  | Low        | Low                |
| 37.Santoro, 2019         | High              | Low        | Low                | Low           | Low                  | Low        | Low                |
| 38.Gitas, 2019           | High              | Low        | Low                | Low           | Low                  | Low        | Low                |
| 39.Kashyap, 2021         | High              | Low        | Low                | Low           | Low                  | Low        | Low                |
| 40.Abdallah, 2022        | High              | Low        | Low                | Low           | Low                  | Low        | Low                |
| 41.Case, 2014            | High              | Low        | Low                | Low           | Low                  | Low        | Low                |

|                       |      |     |     |     |     |     |     |
|-----------------------|------|-----|-----|-----|-----|-----|-----|
| 42.Indermaur,<br>2007 | High | Low | Low | Low | Low | Low | Low |
| 44.Oz, 2014           | High | Low | Low | Low | Low | Low | Low |
| 45.Gungorduk,<br>2015 | High | Low | Low | Low | Low | Low | Low |
| 46.Kashyap,<br>2021   | High | Low | Low | Low | Low | Low | Low |
| 47.Turan, 2012        | High | Low | Low | Low | Low | Low | Low |
| 48.Stephan, 2014      | High | Low | Low | Low | Low | Low | Low |
| 49. Morotti, 2012     | High | Low | Low | Low | Low | Low | Low |

---
